# Supplementary material for: 3,3′-Diindolylmethane Induces G1 Arrest and Apoptosis in Human Acute T-Cell Lymphoblastic Leukemia Cells
Source: PubMed Central journal article supplement (PMC3325915; doi:10.1371/journal.pone.0034975), 2012-04-13
Supplement: pone.0034975.s002.pdf [file pone.0034975.s002.pdf]

**Table S1. DIM-induced changes in expression of genes associated with apoptosis pathway in human CEM cells**

| Unigene                                       | Symbol *        | Description                                            | Length of treatment † |              |                    |              |
|-----------------------------------------------|-----------------|--------------------------------------------------------|-----------------------|--------------|--------------------|--------------|
|                                               |                 |                                                        | 4 hours               |              | 24 hours           |              |
|                                               |                 |                                                        | Log <sub>2</sub> R    | p-value      | Log <sub>2</sub> R | p-value      |
| <i>TNF ligand family</i>                      |                 |                                                        |                       |              |                    |              |
| Hs.592244                                     | <b>CD40LG</b>   | CD40 ligand                                            | <b>0.75</b>           | <b>0.019</b> | <b>0.62</b>        | <b>0.043</b> |
| Hs.2007                                       | FASLG           | Fas ligand (TNF superfamily, member 6)                 | 0.56                  | 0.153        | 0.37               | 0.612        |
| Hs.36                                         | LTA             | Lymphotoxin alpha (TNF superfamily, member 1)          | nd ‡                  | nd           | 0.14               | 0.258        |
| Hs.241570                                     | <b>TNF</b>      | Tumor necrosis factor (TNF superfamily, member 2)      | <b>-0.63</b>          | <b>0.016</b> | -0.39              | 0.026        |
| Hs.478275                                     | TNFSF10         | Tumor necrosis factor (ligand) superfamily, member 10  | 0.38                  | 0.123        | 0.23               | 0.421        |
| Hs.501497                                     | CD70            | CD70 molecule                                          | 0.00                  | 0.981        | -0.04              | 0.852        |
| Hs.654445                                     | <b>TNFSF8</b>   | Tumor necrosis factor (ligand) superfamily, member 8   | <b>0.90</b>           | <b>0.026</b> | 0.34               | 0.009        |
| <i>TNF Receptor &amp; Death Domain Family</i> |                 |                                                        |                       |              |                    |              |
| Hs.472860                                     | CD40            | CD40 molecule, TNF receptor superfamily member 5       | <b>0.70</b>           | 0.521        | <b>-1.12</b>       | 0.255        |
| Hs.244139                                     | FAS             | Fas (TNF receptor superfamily, member 6)               | 0.21                  | 0.160        | 0.00               | 0.993        |
| Hs.1116                                       | LTBR            | Lymphotoxin beta receptor (TNFR superfamily, member 3) | 0.25                  | 0.811        | <b>-0.70</b>       | 0.542        |
| Hs.279594                                     | <b>TNFRSF1A</b> | Tumor necrosis factor receptor superfamily, member 1A  | <b>1.22</b>           | <b>0.002</b> | -0.46              | 0.331        |
| Hs.654459                                     | TNFRSF9         | Tumor necrosis factor receptor superfamily, member 9   | <b>0.70</b>           | 0.475        | <b>-1.22</b>       | 0.068        |
| Hs.591834                                     | TNFRSF10A       | Tumor necrosis factor receptor superfamily, member 10a | -0.11                 | 0.822        | -0.11              | 0.866        |
| Hs.521456                                     | TNFRSF10B       | Tumor necrosis factor receptor superfamily, member 10b | 0.41                  | 0.067        | 0.50               | 0.072        |
| Hs.81791                                      | TNFRSF11B       | Tumor necrosis factor receptor superfamily, member 11b | <b>-1.02</b>          | 0.253        | <b>-1.56</b>       | 0.136        |
| Hs.443577                                     | TNFRSF21        | Tumor necrosis factor receptor superfamily, member 21  | 0.06                  | 0.384        | -0.31              | 0.149        |
| Hs.462529                                     | <b>TNFRSF25</b> | Tumor necrosis factor receptor superfamily, member 25  | nd                    | nd           | <b>-1.15</b>       | <b>0.015</b> |
| Hs.355307                                     | CD27            | CD27 molecule                                          | 0.15                  | 0.142        | 0.01               | 0.904        |
| Hs.380277                                     | DAPK1           | Death-associated protein kinase 1                      | -0.08                 | 0.671        | -0.21              | 0.162        |
| Hs.86131                                      | FADD            | Fas (TNFRSF6)-associated via death domain              | 0.12                  | 0.603        | -0.48              | 0.057        |
| Hs.460996                                     | TRADD           | TNFRSF1A-associated via death domain                   | 0.00                  | 1.000        | 0.10               | 0.492        |
| <i>Bcl-2 family</i>                           |                 |                                                        |                       |              |                    |              |
| Hs.370254                                     | BAD             | BCL2-associated agonist of cell death                  | 0.36                  | 0.083        | <b>-0.66</b>       | 0.283        |
| Hs.377484                                     | BAG1            | BCL2-associated athanogene                             | -0.46                 | 0.024        | -0.25              | 0.084        |
| Hs.523309                                     | BAG3            | BCL2-associated athanogene 3                           | 0.07                  | 0.559        | 0.01               | 0.907        |
| Hs.194726                                     | BAG4            | BCL2-associated athanogene 4                           | 0.03                  | 0.830        | -0.42              | 0.130        |
| Hs.485139                                     | BAK1            | BCL2-antagonist/killer 1                               | 0.11                  | 0.615        | -0.30              | 0.068        |
| Hs.624291                                     | BAX             | BCL2-associated X protein                              | 0.21                  | 0.168        | 0.16               | 0.536        |
| Hs.150749                                     | BCL2            | B-cell CLL/lymphoma 2                                  | 0.28                  | 0.074        | -0.15              | 0.433        |
| Hs.227817                                     | BCL2A1          | BCL2-related protein A1                                | -0.19                 | 0.379        | 0.32               | 0.539        |
| Hs.516966                                     | BCL2L1          | BCL2-like 1                                            | <b>0.61</b>           | 0.081        | -0.31              | 0.606        |
| Hs.283672                                     | <b>BCL2L10</b>  | BCL2-like 10 (apoptosis facilitator)                   | <b>1.05</b>           | 0.459        | <b>0.63</b>        | <b>0.023</b> |
| Hs.469658                                     | BCL2L11         | BCL2-like 11 (apoptosis facilitator)                   | -0.51                 | 0.113        | -0.04              | 0.799        |
| Hs.410026                                     | BCL2L2          | BCL2-like 2                                            | 0.24                  | 0.134        | -0.01              | 0.945        |
| Hs.486542                                     | BCLAF1          | BCL2-associated transcription factor 1                 | -0.36                 | 0.016        | -0.41              | 0.080        |
| Hs.591054                                     | BID             | BH3 interacting domain death agonist                   | -0.31                 | 0.073        | -0.21              | 0.153        |

**Table S1. DIM-induced changes in expression of genes associated with apoptosis pathway in human CEM cells**

| Unigene                                     | Symbol * | Description                                                                       | Length of treatment † |              |                    |              |
|---------------------------------------------|----------|-----------------------------------------------------------------------------------|-----------------------|--------------|--------------------|--------------|
|                                             |          |                                                                                   | 4 hours               |              | 24 hours           |              |
|                                             |          |                                                                                   | Log <sub>2</sub> R    | p-value      | Log <sub>2</sub> R | p-value      |
| Hs.475055                                   | BIK      | BCL2-interacting killer (apoptosis-inducing)                                      | -0.11                 | 0.656        | <b>-0.71</b>       | 0.066        |
| Hs.145726                                   | BNIP1    | BCL2/adenovirus E1B 19kDa interacting protein 1                                   | 0.19                  | 0.311        | <b>-0.70</b>       | 0.058        |
| Hs.646490                                   | BNIP2    | BCL2/adenovirus E1B 19kDa interacting protein 2                                   | 0.21                  | 0.211        | 0.00               | 0.977        |
| Hs.144873                                   | BNIP3    | BCL2/adenovirus E1B 19kDa interacting protein 3                                   | -0.38                 | 0.054        | -0.58              | 0.004        |
| Hs.131226                                   | BNIP3L   | BCL2/adenovirus E1B 19kDa interacting protein 3-like                              | -0.10                 | 0.645        | -0.18              | 0.081        |
| Hs.87247                                    | HRK      | Harakiri, BCL2 interacting protein (contains only BH3 domain)                     | <b>0.88</b>           | <b>0.014</b> | <b>1.35</b>        | <b>0.004</b> |
| Hs.632486                                   | MCL1     | Myeloid cell leukemia sequence 1 (BCL2-related)                                   | -0.38                 | 0.077        | -0.20              | 0.077        |
| <b>Caspase family &amp; death effectors</b> |          |                                                                                   |                       |              |                    |              |
| Hs.2490                                     | CASP1    | Caspase 1, apoptosis-related cysteine peptidase (interleukin 1, beta, convertase) | -0.07                 | 0.576        | 0.25               | 0.117        |
| Hs.5353                                     | CASP10   | Caspase 10, apoptosis-related cysteine peptidase                                  | 0.51                  | 0.018        | 0.23               | 0.067        |
| Hs.466057                                   | CASP14   | Caspase 14, apoptosis-related cysteine peptidase                                  | <b>-0.82</b>          | 0.294        | <b>-0.65</b>       | 0.529        |
| Hs.368982                                   | CASP2    | Caspase 2, apoptosis-related cysteine peptidase                                   | 0.00                  | 0.981        | -0.48              | 0.000        |
| Hs.141125                                   | CASP3    | Caspase 3, apoptosis-related cysteine peptidase                                   | 0.14                  | 0.687        | -0.33              | 0.010        |
| Hs.138378                                   | CASP4    | Caspase 4, apoptosis-related cysteine peptidase                                   | 0.45                  | 0.275        | 0.15               | 0.239        |
| Hs.213327                                   | CASP5    | Caspase 5, apoptosis-related cysteine peptidase                                   | <b>0.84</b>           | 0.556        | <b>-0.96</b>       | 0.361        |
| Hs.654616                                   | CASP6    | Caspase 6, apoptosis-related cysteine peptidase                                   | -0.04                 | 0.770        | -0.04              | 0.673        |
| Hs.9216                                     | CASP7    | Caspase 7, apoptosis-related cysteine peptidase                                   | 0.01                  | 0.918        | -0.23              | 0.083        |
| Hs.599762                                   | CASP8    | Caspase 8, apoptosis-related cysteine peptidase                                   | 0.40                  | 0.215        | 0.18               | 0.668        |
| Hs.329502                                   | CASP9    | Caspase 9, apoptosis-related cysteine peptidase                                   | 0.23                  | 0.060        | 0.30               | 0.409        |
| Hs.390736                                   | CFLAR    | CASP8 and FADD-like apoptosis regulator                                           | 0.20                  | 0.369        | 0.04               | 0.779        |
| <b>IAP family</b>                           |          |                                                                                   |                       |              |                    |              |
| Hs.710305                                   | NAIP     | NLR family, apoptosis inhibitory protein                                          | 0.12                  | 0.382        | 0.06               | 0.424        |
| Hs.696238                                   | BIRC2    | Baculoviral IAP repeat-containing 2                                               | 0.41                  | 0.029        | 0.16               | 0.168        |
| Hs.127799                                   | BIRC3    | Baculoviral IAP repeat-containing 3                                               | 0.48                  | 0.016        | 0.04               | 0.743        |
| Hs.150107                                   | BIRC6    | Baculoviral IAP repeat-containing 6                                               | -0.28                 | 0.053        | -0.14              | 0.292        |
| Hs.348263                                   | BIRC8    | Baculoviral IAP repeat-containing 8                                               | <b>-0.82</b>          | 0.294        | <b>-1.01</b>       | 0.325        |
| Hs.356076                                   | XIAP     | X-linked inhibitor of apoptosis                                                   | 0.28                  | 0.171        | -0.16              | 0.210        |
| <b>TRAF family</b>                          |          |                                                                                   |                       |              |                    |              |
| Hs.522506                                   | TRAF2    | TNF receptor-associated factor 2                                                  | <b>1.14</b>           | 0.166        | <b>-1.90</b>       | 0.054        |
| Hs.510528                                   | TRAF3    | TNF receptor-associated factor 3                                                  | <b>1.17</b>           | 0.011        | <b>-1.42</b>       | 0.112        |
| Hs.8375                                     | TRAF4    | TNF receptor-associated factor 4                                                  | nd                    | nd           | <b>-1.51</b>       | <b>0.017</b> |
| <b>CARD family</b>                          |          |                                                                                   |                       |              |                    |              |
| Hs.552567                                   | APAF1    | Apoptotic peptidase activating factor 1                                           | 0.25                  | 0.140        | -0.46              | 0.068        |
| Hs.193516                                   | BCL10    | B-cell CLL/lymphoma 10                                                            | -0.06                 | 0.817        | 0.23               | 0.390        |
| Hs.405153                                   | NOD1     | Nucleotide-binding oligomerization domain containing 1                            | 0.08                  | 0.360        | -0.19              | 0.035        |
| Hs.200242                                   | CARD6    | Caspase recruitment domain family, member 6                                       | 0.28                  | 0.344        | <b>0.69</b>        | 0.134        |
| Hs.446146                                   | CARD8    | Caspase recruitment domain family, member 8                                       | nd                    | nd           | 0.33               | 0.287        |

**Table S1. DIM-induced changes in expression of genes associated with apoptosis pathway in human CEM cells**

| Unigene                            | Symbol * | Description                                                 | Length of treatment † |         |                    |         |
|------------------------------------|----------|-------------------------------------------------------------|-----------------------|---------|--------------------|---------|
|                                    |          |                                                             | 4 hours               |         | 24 hours           |         |
|                                    |          |                                                             | Log <sub>2</sub> R    | p-value | Log <sub>2</sub> R | p-value |
| Hs.38533                           | CRADD    | CASP2 and RIPK1 domain containing adaptor with death domain | 0.08                  | 0.740   | -0.07              | 0.541   |
| Hs.513667                          | NOL3     | Nucleolar protein 3 (apoptosis repressor with CARD domain)  | 0.18                  | 0.423   | 0.55               | 0.078   |
| Hs.499094                          | PYCARD   | PYD and CARD domain containing                              | -0.01                 | 0.910   | 0.01               | 0.869   |
| Hs.103755                          | RIPK2    | Receptor-interacting serine-threonine kinase 2              | <b>0.66</b>           | 0.105   | 0.16               | 0.116   |
| <b>CIDE domain family</b>          |          |                                                             |                       |         |                    |         |
| Hs.249129                          | CIDEA    | Cell death-inducing DFFA-like effector a                    | -0.16                 | 0.822   | <b>-1.91</b>       | 0.257   |
| Hs.642693                          | CIDEB    | Cell death-inducing DFFA-like effector b                    | -0.03                 | 0.829   | <b>-1.01</b>       | 0.093   |
| Hs.484782                          | DFFA     | DNA fragmentation factor, 45kDa, alpha polypeptide          | -0.06                 | 0.744   | -0.32              | 0.206   |
| <b>p53 and DNA damage response</b> |          |                                                             |                       |         |                    |         |
| Hs.431048                          | ABL1     | C-abl oncogene 1, receptor tyrosine kinase                  | 0.36                  | 0.000   | 0.08               | 0.720   |
| Hs.525622                          | AKT1     | V-akt murine thymoma viral oncogene homolog 1               | 0.00                  | 0.992   | <b>-0.79</b>       | 0.095   |
| Hs.80409                           | GADD45A  | Growth arrest and DNA-damage-inducible, alpha               | 0.40                  | 0.191   | 0.37               | 0.091   |
| Hs.654481                          | TP53     | Tumor protein p53                                           | 0.18                  | 0.452   | -0.16              | 0.448   |
| Hs.523968                          | TP53BP2  | Tumor protein p53 binding protein, 2                        | 0.01                  | 0.905   | -0.23              | 0.176   |
| Hs.697294                          | TP73     | Tumor protein p73                                           | 0.06                  | 0.938   | -0.39              | 0.157   |
| <b>Anti-apoptosis</b>              |          |                                                             |                       |         |                    |         |
| Hs.550061                          | BRAF     | V-raf murine sarcoma viral oncogene homolog B1              | 0.34                  | 0.009   | -0.15              | 0.161   |
| Hs.435556                          | BFAR     | Bifunctional apoptosis regulator                            | 0.00                  | 0.989   | 0.03               | 0.744   |
| Hs.643120                          | IGF1R    | Insulin-like growth factor 1 receptor                       | -0.28                 | 0.248   | 0.01               | 0.921   |

Note: Genes are categorized according to functional groupings as outlined by the Human Apoptosis RT<sup>2</sup> Profiler™ PCR Array gene table; some genes belong to more than one category.

\* Gene symbols in bold meet criteria for fold-change threshold and statistical significance.

† Log<sub>2</sub> fold-change (R) values are shown in bold if level of change is >1.5-fold (Log<sub>2</sub> R < -0.58 or >0.58) compared to vehicle (0.1% DMSO) control. P-values are compared to vehicle treatment as determined by a Student's *t*-test assuming equal variances. Genes highlighted in blue passed both fold-change and statistics criteria for at least one time-point.

‡ nd, not detected by RT<sup>2</sup> PCR profiler array at this time point (*C*<sub>1</sub> >35).
